# Supplementary material for: Exploration of Cytotoxic Potential of Longifolene/Junipene Isolated from Chrysopogon zizanioides
Source: MDPI journal article supplement (doi:10.3390/molecules27185764), 2022-09-06
Supplement: s1 [file s1]

## Exploration of Cytotoxic Potential of Longifolene/Junipene Isolated from *Chrysopogon zizanioides*

Madhuri Grover <sup>1,2</sup>, Tapan Behl <sup>3,\*</sup>, Tarun Virmani <sup>2</sup>, Mohit Sanduja <sup>4</sup>, Hafiz A. Makeen <sup>5</sup>, Mohammed Albratty <sup>6</sup>, Hassan A. Alhazmi <sup>6,7</sup>, Abdulkarim M. Meraya <sup>5</sup> and Simona Gabriela Bungau <sup>8,9,\*</sup>

<sup>1</sup> Bhawani Shankar (B.S.) Anangpuria Institute of Pharmacy, Alampur, Ballabgarh 121004, India

<sup>2</sup> School of Pharmaceutical Sciences, Modern vidya Niketan MVN University, Palwal 121105, Haryana, India

<sup>3</sup> School of Health Sciences, University of Petroleum and Energy Studies,

Dehradun 248007, Uttarakhand, India

<sup>4</sup> Department of Pharmacy, School of Medical and Allied Sciences, GD Goenka University, Gurugram 122103, Haryana, India

<sup>5</sup> Pharmacy Practice Research Unit, Clinical Pharmacy Department, College of Pharmacy, Jazan University, Jazan 45142, Saudi Arabia

<sup>6</sup> Department of Pharmaceutical Chemistry, College of Pharmacy, Jazan University, Jazan 45142, Saudi Arabia

<sup>7</sup> Substance Abuse and Toxicology Research Centre, Jazan University, Jazan 45142, Saudi Arabia

<sup>8</sup> Department of Pharmacy, Faculty of Medicine and Pharmacy, University of Oradea, 410087 Oradea, Romania

<sup>9</sup> Doctoral School of Biomedical Sciences, University of Oradea, 410087 Oradea, Romania

\* Correspondence: tapanbehl31@gmail.com (T.B.); simonabungau@gmail.com (S.G.B.)

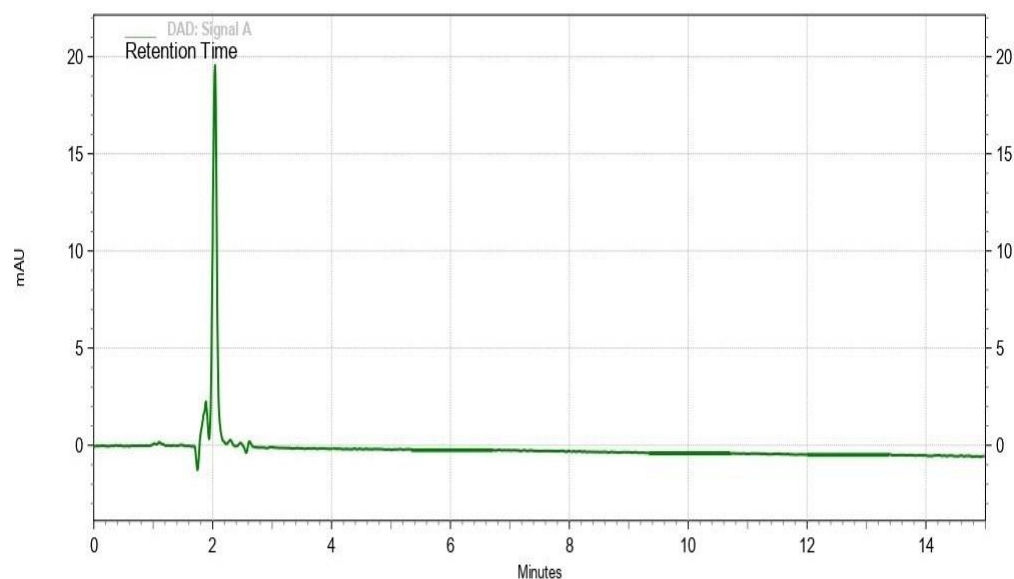

**Figure S1.** HPLC analysis of isolated unknown compound 'X'.

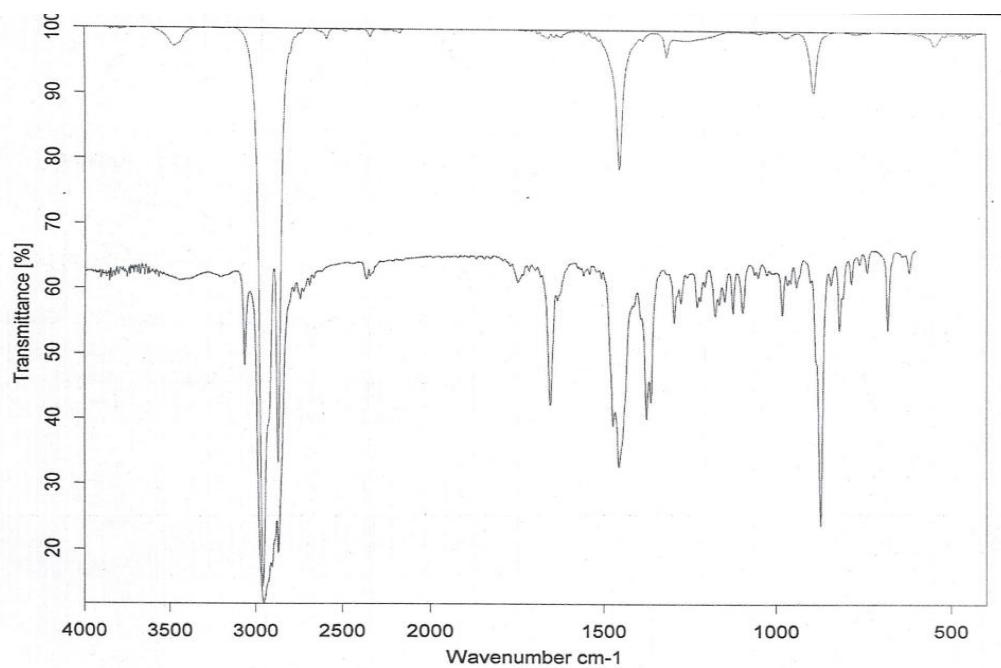

**Figure S2.** FTIR of the standard and isolated unknown compound 'X'.

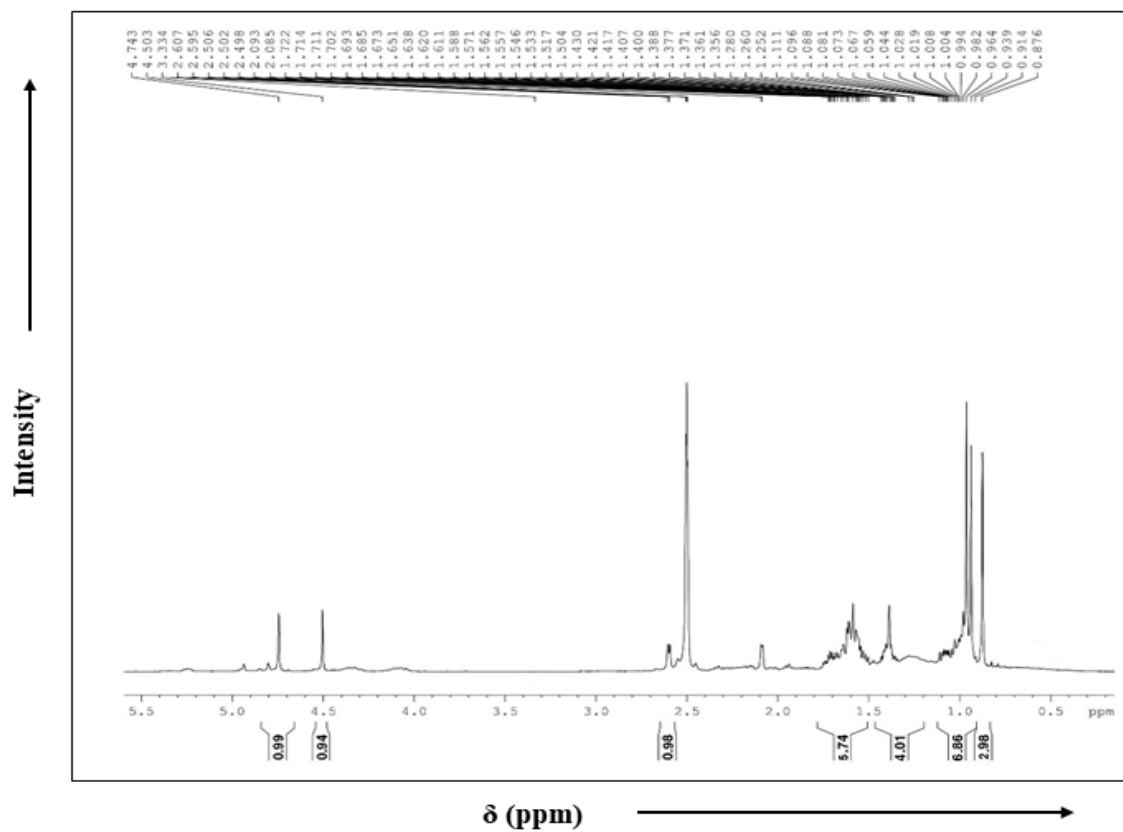

**Figure S3.** Proton [<sup>1</sup>H] NMR of isolated unknown compound 'X'.

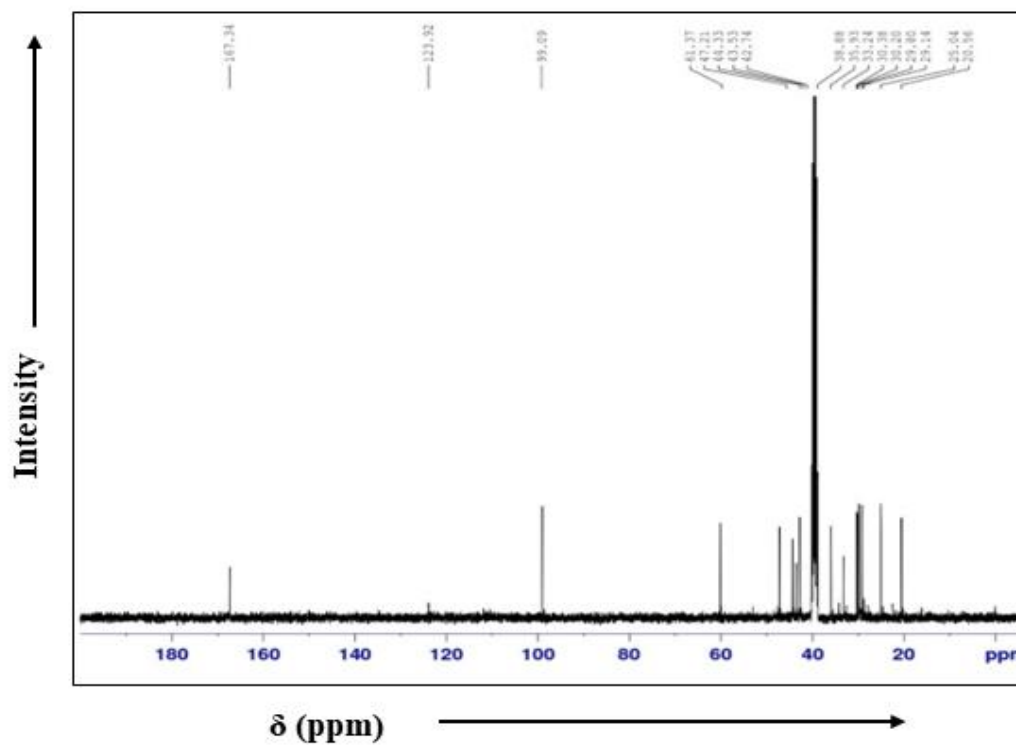

**Figure S4.** Carbon [ $^{13}\text{C}$ ] NMR of isolated unknown compound 'X'.

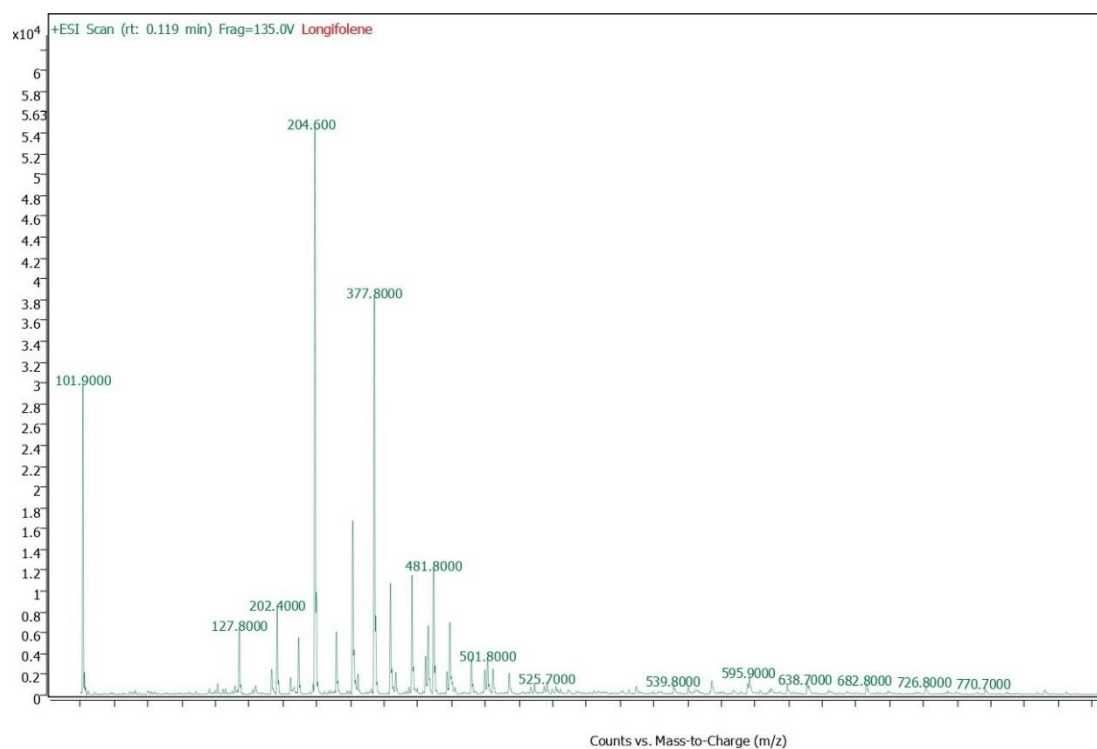

**Figure S5.** LC-MS of isolated unknown compound 'X'.
